# Supplementary material for: Efficient synthesis of porous triazine-based macrocycles with 22-carbon and 6-nitrogen ring atoms and their adsorption/desorption of non-volatile organic compounds
Source: Royal Society of Chemistry journal article supplement (doi:10.1039/d4cc04983g), 2024-01-01
Supplement: d4cc04983g1.pdf [file d4cc04983g1.pdf]

# Efficient synthesis of porous triazine-based macrocycles with 22-carbon and 6-nitrogen ring atoms and their adsorption/desorption of non-volatile organic compounds

Zi-Ting Gu <sup>a</sup>, Hao-Chin Chen<sup>a</sup>, Jin-Peng Yang<sup>a</sup>, Hsiu-Fu Hsu, <sup>b</sup> Ting-shen Kuo <sup>c</sup>, and Long-Li Lai<sup>a,\*</sup>

<sup>a</sup> Department of Applied Chemistry, National Chi Nan University, Puli, Nantou 545, Taiwan

<sup>b</sup> Department of Chemistry, Tamkang University, Tamsui 251, Taiwan

<sup>c</sup> National Taiwan Normal University No. 88, Sec. 4, Ting-Chow Rd, Taipei 116, Taiwan

E-Mail: [lilai@ncnu.edu.tw](mailto:lilai@ncnu.edu.tw)

## Supporting information

|                                                                                                                                                                                          |    |
|------------------------------------------------------------------------------------------------------------------------------------------------------------------------------------------|----|
| Experimental section .....                                                                                                                                                               | 1  |
| Materials and general methods: .....                                                                                                                                                     | 1  |
| Crystallographic determination: .....                                                                                                                                                    | 1  |
| Synthesis of intermediate <b>A</b> .....                                                                                                                                                 | 1  |
| Synthesis of macrocycle <b>2a</b> .....                                                                                                                                                  | 3  |
| Synthesis of macrocycle <b>2b</b> .....                                                                                                                                                  | 6  |
| Table S1. Crystal data and structure refinement for <b>2a•1THF•1MeOH</b> . (Squeezed THF & CH <sub>3</sub> OH, CCDC#2328542) .....                                                       | 9  |
| Table S2. Bond lengths [Å] and angles [°] for <b>2a•1THF•1MeOH</b> (CCDC#2328542).....                                                                                                   | 10 |
| Table S3. The intermolecular H-bond (NH-N, NH-C, CH-Cl) and $\pi$ - $\pi$ (CH- $\pi$ , $\pi$ - $\pi$ ) interactions of macrocycle <b>2a</b> (THF and MeOH omitted) in the framework..... | 12 |
| Figure S1. Thermogravimetric analysis of dried <b>2a</b> and <b>2b</b> from 50 to 850 °C at a heating rate of 10 °C min <sup>-1</sup> under an N <sub>2</sub> atmosphere. ....           | 16 |
| Figure S2. The pore size distributions of <b>2a</b> and <b>2b</b> , calculated by NLDFT based on their N <sub>2</sub> isotherms at 77 K. ....                                            | 17 |
| Figure S3. The <sup>1</sup> H-NMR spectra of <b>2a</b> , SDS and <b>2a-SDS</b> in showing the adsorption of SDS by <b>2a</b> .....                                                       | 18 |
| Figure S4. The <sup>1</sup> H-NMR spectra of <b>2b</b> with BPA, SDS, SMZ and Brij35, respectively, in showing their adsorption by <b>2b</b> . ....                                      | 20 |
| Figure S5. The H-chemical shifts of <b>2b</b> and <b>2b</b> with BPA, SDS, SMZ and Brij35, respectively. ....                                                                            | 23 |
| Figure S6. The H-chemical shifts of <b>2b</b> after recovery. ....                                                                                                                       | 24 |

## Experimental section

**Materials and general methods:** Reagents were used as received without further purification.  $^1\text{H}$  and  $^{13}\text{C}$  NMR spectra were recorded on a Bruker AMX-300 solution NMR spectrometers. Elemental analyses were carried out using an Elementar UNICUBE analyzer. Thermogravimetric analyses were performed under nitrogen with a Perkin-Elmer TGA-7 TG analyzer. Brunauer-Emmett-Teller (BET) analyses were examined with a Micrometrics TriStar II Plus system using nitrogen as the adsorbate at 77 K and carbon dioxide as the adsorbate at 195 K. All gases used were of 99.9995% purity. Crystallographic analyses were performed by Bruker D8 Venture diffractometer. HRMS were obtained from Bruker Autoflex speed MALDI-TOFMS, Bruker Compact ESI-QTOF-MS

**Crystallographic determination:** A suitable single crystal of **2a** or **2a·1THF·MeOH** was mounted on the tip of a glass fiber with dimensions of 0.11 x 0.04 x 0.02 mm<sup>3</sup> and then placed onto the goniometer head for indexing; the intensity data collection using a Bruker D8 Venture diffractometer was equipped with graphite-monochromatized Mo K $\alpha$  radiation ( $\lambda = 0.71073 \text{ \AA}$ ). Collection of intensity data was conducted at 200 K. Empirical absorptions were applied using the multi-scan method. The structure was solved by direct methods and refined against F<sup>2</sup> by the full-matrix least-squares technique using the SHELX-97 software packages.<sup>1</sup>

### Synthesis of intermediate A

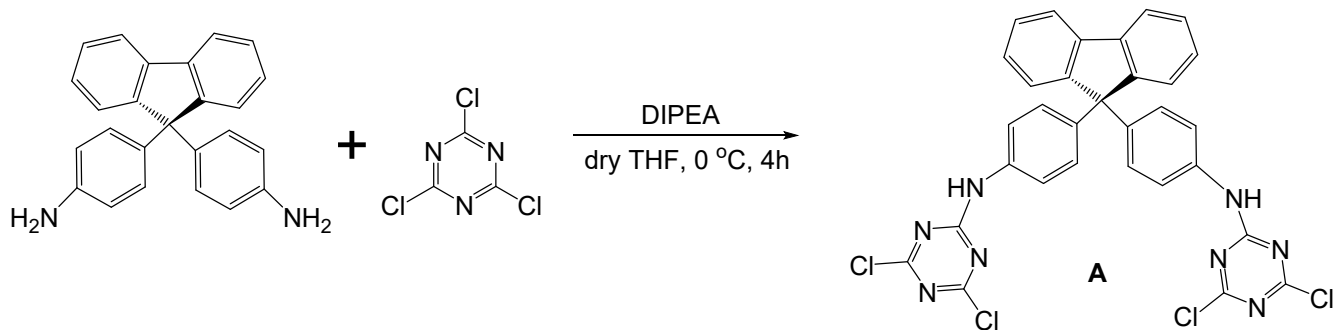

9,9-Bis(4-aminophenyl)fluorene (1.74 g, 5.0 mmol) and N,N-diisopropyl-ethylamine (1.55 g, 12.0 mmol) in dry THF (20 mL) were gradually added to cyanuric chloride (1.85 g, 10.0 mmol) in dry THF (30 mL) at 5 °C and then stirred for 4hr. After the reaction (confirmed by TLC), solvent was removed at reduced pressure to yield a solid, which was further purified by chromatography (SiO<sub>2</sub>: 20 x 2.2 cm, eluates: THF-hexane [1:2]) and then recrystallized by CH<sub>2</sub>Cl<sub>2</sub>-hexane (1:1), giving intermediate **A** in 87%

(2.80 g).  $^1\text{H}$  NMR (300 MHz,  $\text{DMSO-}D_6$ , 25 °C, TMS):  $\delta$  7.13 (d,  $J=8.7$ , 4H, 4 $\times$ Ar-H ), 7.30-7.50 (m, 10H, 10 $\times$ Ar-H ), 7.93 (d,  $J=7.2$ , 2H, 2 $\times$ Ar-H), 11.13 (s, 2H, 2 $\times$ NH ) ppm.  $^{13}\text{C}$  NMR (75 MHz,  $\text{DMSO-}D_6$ , 25 °C, TMS):  $\delta$  64.19, 120.59, 121.53, 126.08, 127.78, 127.96, 128.11, 135.51, 139.53, 142.09, 150.38, 163.65, 168.78, 169.71 ppm. MS cacl'd for  $\text{C}_{31}\text{H}_{18}\text{Cl}_4\text{N}_8$   $[\text{M}]^+$ : 644.3; found 644.4.

### $^1\text{H}$ NMR of A

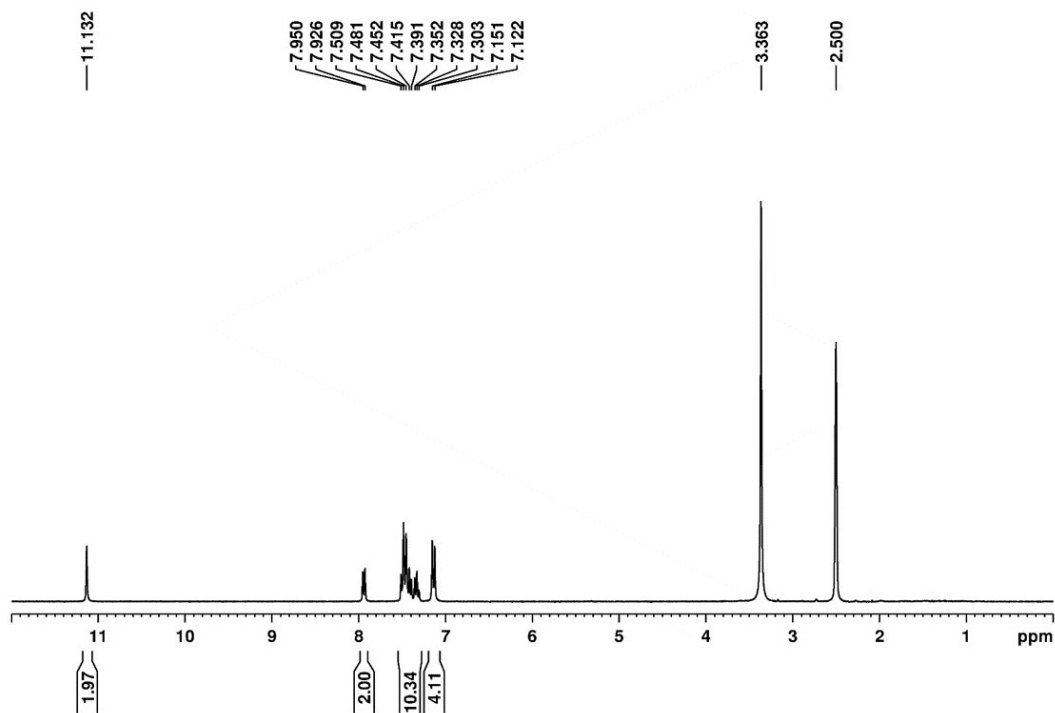

### $^{13}\text{C}$ NMR of A

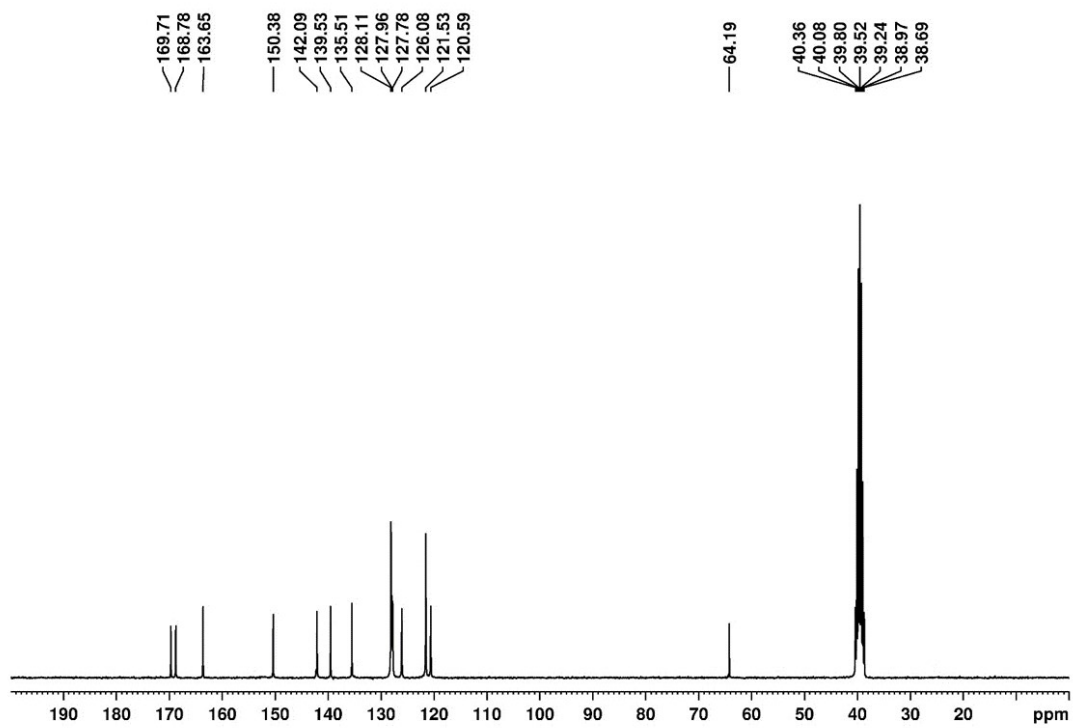

mass spectra of **A**

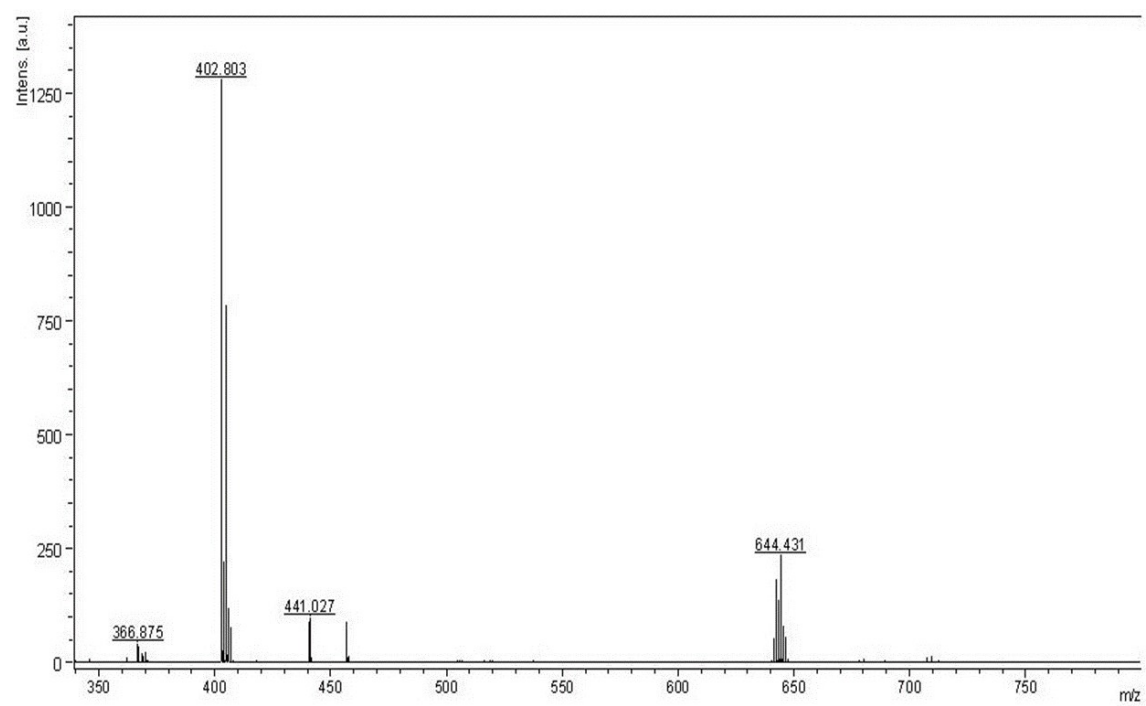

## Synthesis of macrocycle **2a**

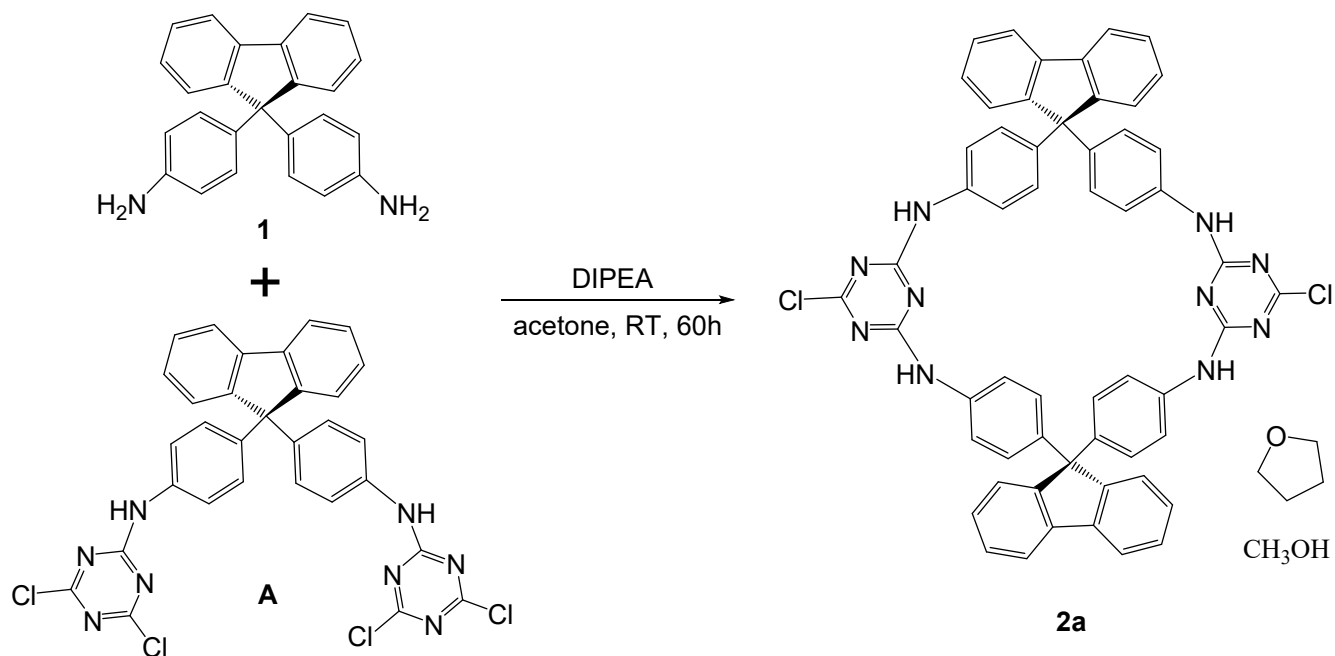

Intermediate **A** (0.644 g, 1.0 mmol) in acetone (90 mL) and 9,9-bis(4-aminophenyl)fluorene **1** (0.348 g, 1.0 mmol) in acetone (90 mL) were simultaneously added to *N,N*-diisopropylethylamine (0.310 g, 2.4 mmol) in acetone (200 mL) gradually at room temperature and then stirred for 60 h. After the reaction (confirmed by TLC), solvent was removed at reduced pressure to give a solid which was further recrystallized by THF-MeOH (1:2), yielding macrocycle **2a** in 60% (0.60g)

<sup>1</sup>H NMR (300 MHz, DMSO-D<sub>6</sub>, 25 °C, TMS): δ , 7.10 (d, *J*=8.7, 8H, 8×Ar-H ), 7.35-7.46 (m, 20H, 20×Ar-H ), 7.97 (d, *J*=7.5, 4H, 4×Ar-H ), 10.11 (s, 4H, 4×NH ) ppm. <sup>13</sup>C NMR (75 MHz, DMSO-D<sub>6</sub>, 25 °C, TMS): δ 64.20, 120.87, 122.69, 125.66, 127.63, 127.81, 127.94, 136.84, 139.62, 140.84, 150.66, 164.27, 168.17 ppm. HRMS caclcd for C<sub>56</sub>H<sub>36</sub>Cl<sub>2</sub>N<sub>10</sub> [M]<sup>+</sup>: 919.2580; found 919.2574. Elemental analysis calcd for C<sub>56</sub>H<sub>36</sub>Cl<sub>2</sub>N<sub>10</sub>+MeOH: C 71.92; H 4.24; N 14.71 %; found C 71.89; H 4.05; N 14.80 %.

<sup>1</sup>H NMR of **2a**

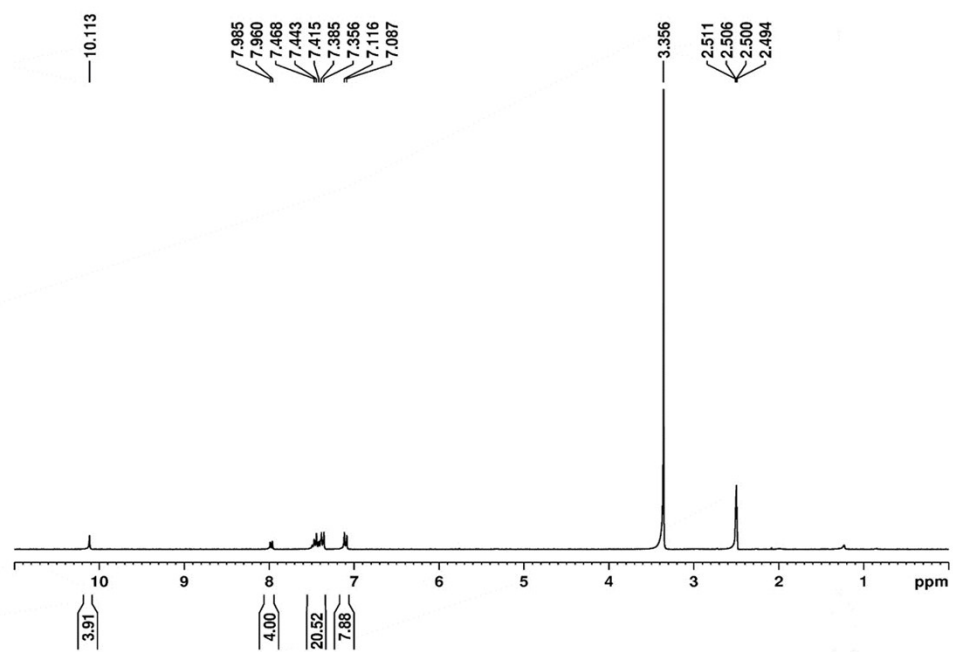

<sup>13</sup>C NMR of 2a

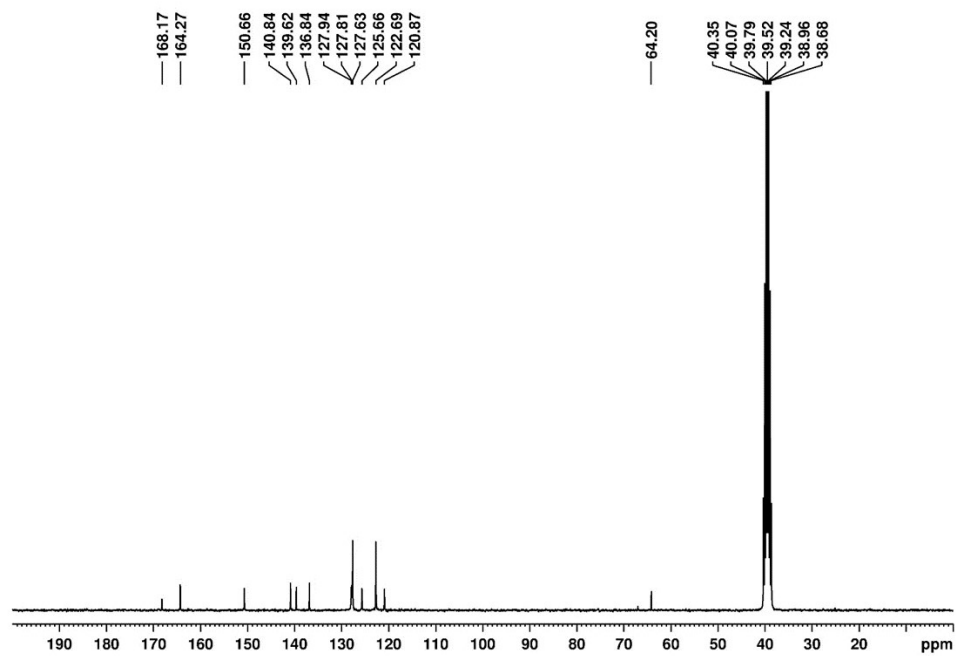

### HRMS of 2a

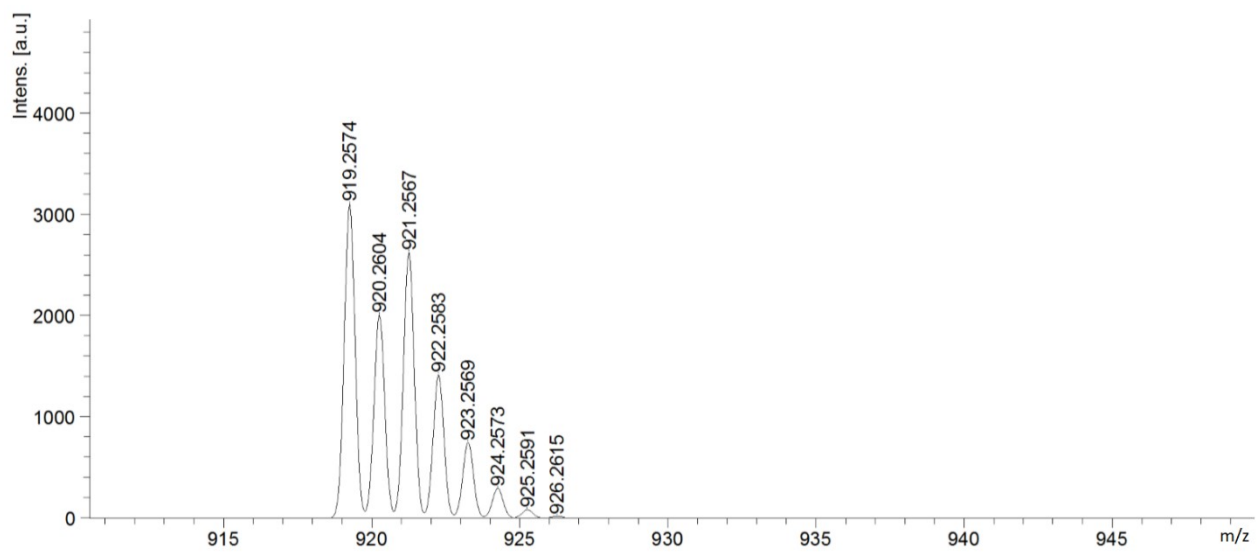



## Synthesis of macrocycle **2b**

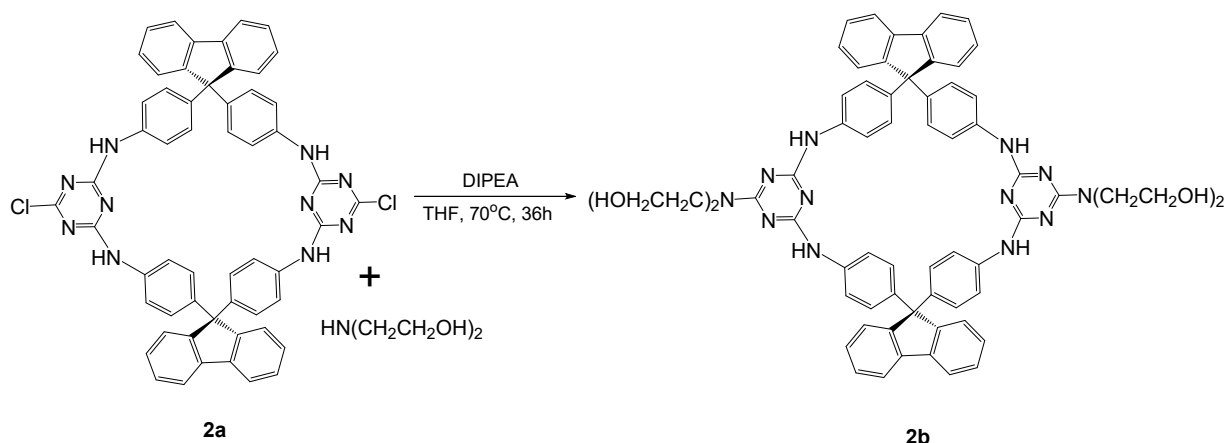

Compound **2a** (0.46 g, 0.5 mmol), diethanolamine (0.52 g, 5.0 mmol) and N,N-diisopropylethylamine (0.15 g, 1.2 mmol) were added to THF (25 mL) and then heated at 70 °C for 36h. After the reaction (confirmed by TLC), solvent was removed at reduced pressure to give a solid which was further purified by chromatography ( $\text{SiO}_2$ : 20 x 2.2 cm, eluates: THF-hexane [3:1]) and then recrystallized by THF-hexane (2:1), giving macrocycle **2b** in 72% (0.38 g).

$^1\text{H}$  NMR (300 MHz,  $\text{DMSO-D}_6$ , 25 °C, TMS):  $\delta$  3.57-3.62 (m, 16H,  $8 \times \text{CH}_2$ ), 4.74 (t,  $J=4.8$ , 4H,  $4 \times \text{OH}$ ), 7.05 (d,  $J=8.7$ , 8H,  $8 \times \text{Ar-H}$ ), 7.36-7.50 (m, 20H,  $20 \times \text{Ar-H}$ ), 7.95 (d,  $J=7.2$ , 4H,  $4 \times \text{Ar-H}$ ), 8.99 (s, 4H,  $4 \times \text{NH}$ ) ppm.  $^{13}\text{C}$  NMR (75 MHz,  $\text{DMSO-D}_6$ , 25 °C, TMS):  $\delta$  49.93, 59.40, 64.15, 120.78, 122.02, 125.90, 127.49, 127.74, 138.60, 139.66, 151.12, 164.50, 165.15 ppm. HRMS calcd for  $\text{C}_{64}\text{H}_{56}\text{N}_{12}\text{O}_4$   $[\text{M}]^+$ : 1057.4626; found 1057.4620. Elemental analysis calcd for  $\text{C}_{68}\text{H}_{64}\text{N}_{12} + \text{H}_2\text{O} + 2\text{THF}$ : C 70.92; H 6.12; N 13.78 %; found C 70.61; H 6.03; N 13.88 %.

$^1\text{H}$  NMR of **2b**

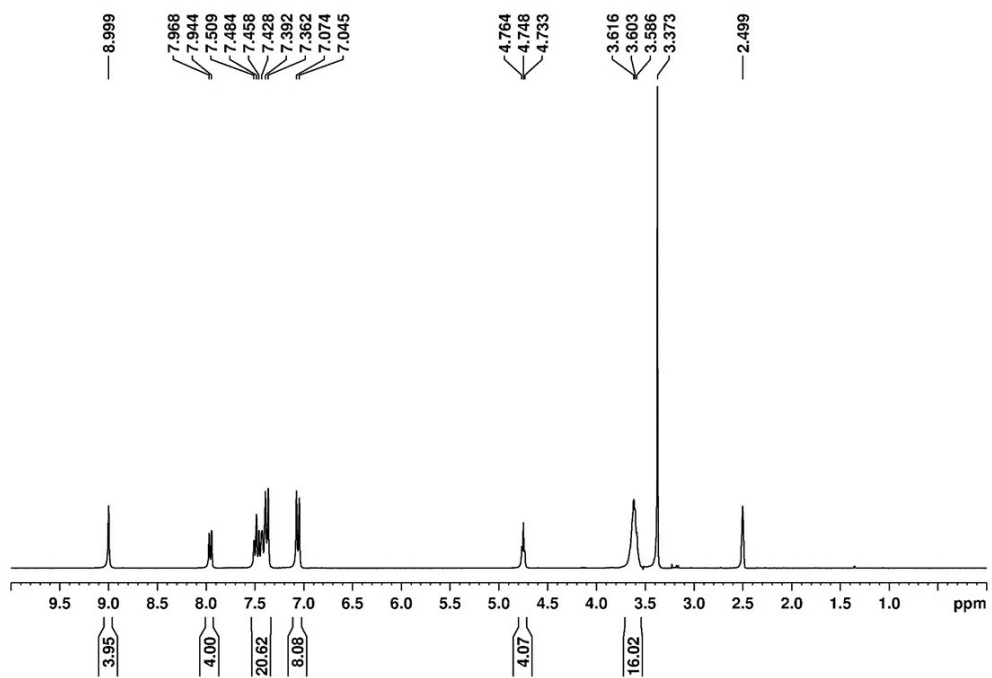

$^{13}\text{C}$  NMR of **2b**

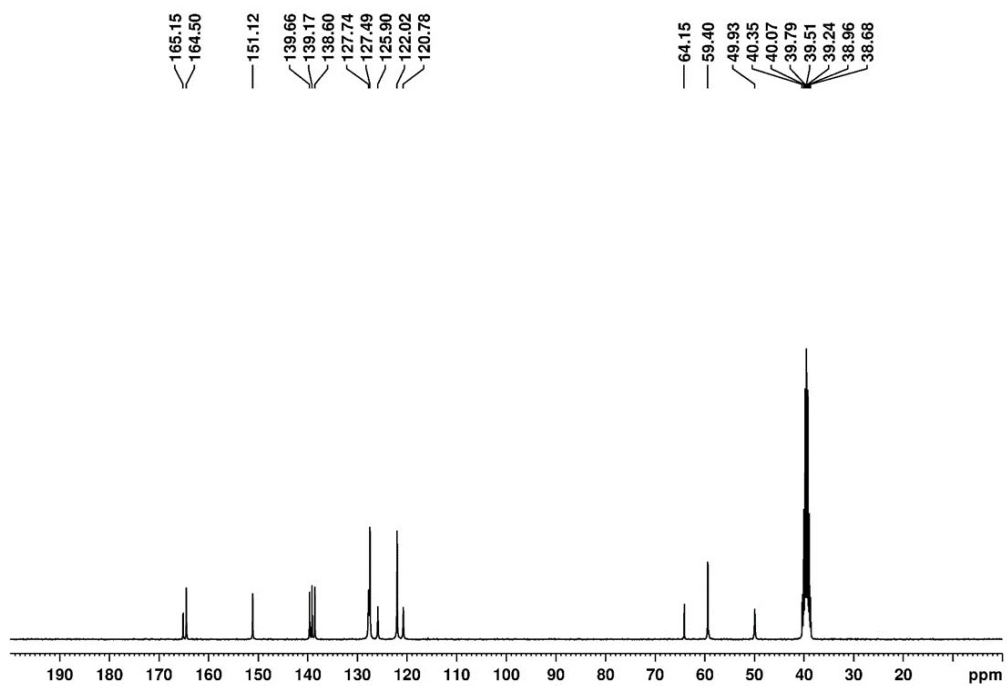

### HRMS of 2b

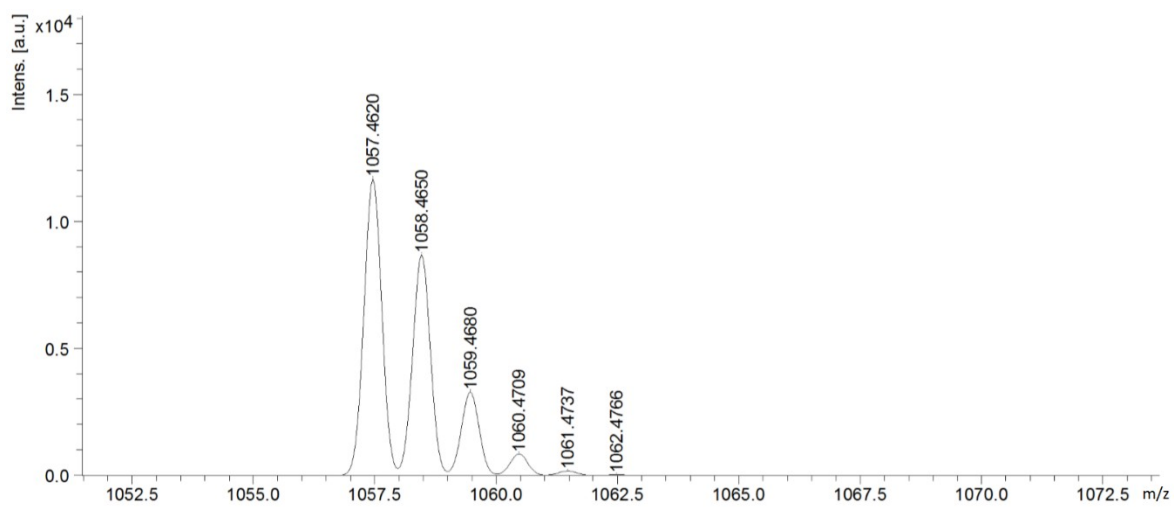

**Table S1.** Crystal data and structure refinement for **2a•1THF•1MeOH**. (Squeezed THF & CH<sub>3</sub>OH, CCDC#[2328542](#))

|                     |                                                                                                                                                            |
|---------------------|------------------------------------------------------------------------------------------------------------------------------------------------------------|
| Identification code | shelx                                                                                                                                                      |
| Empirical formula   | C <sub>61</sub> H <sub>48</sub> Cl <sub>2</sub> N <sub>10</sub> O <sub>2</sub> (C <sub>56</sub> H <sub>36</sub> Cl <sub>2</sub> N <sub>10</sub> +THF+MeOH) |
| Formula weight      | 1024.02                                                                                                                                                    |
| Temperature         | 200(2) K                                                                                                                                                   |
| Wavelength          | 0.71073 Å                                                                                                                                                  |
| Crystal system      | Triclinic                                                                                                                                                  |
| Space group         | P -1                                                                                                                                                       |

|                                   |                                             |                  |
|-----------------------------------|---------------------------------------------|------------------|
| Unit cell dimensions              | a = 13.5359(11) Å                           | α = 102.627(3)°. |
|                                   | b = 14.6708(11) Å                           | β = 100.704(3)°. |
|                                   | c = 16.4233(13) Å                           | γ = 114.701(3)°. |
| Volume                            | 2746.4(4) Å <sup>3</sup>                    |                  |
| Z                                 | 2                                           |                  |
| Density (calculated)              | 1.112 Mg/m <sup>3</sup>                     |                  |
| Absorption coefficient            | 0.162 mm <sup>-1</sup>                      |                  |
| F(000)                            | 952                                         |                  |
| Crystal size                      | 0.270 x 0.100 x 0.050 mm <sup>3</sup>       |                  |
| Theta range for data collection   | 2.175 to 25.129°.                           |                  |
| Index ranges                      | -16<=h<=16, -17<=k<=17, -19<=l<=19          |                  |
| Reflections collected             | 74086                                       |                  |
| Independent reflections           | 9772 [R(int) = 0.0770]                      |                  |
| Completeness to theta = 25.129°   | 99.5 %                                      |                  |
| Refinement method                 | Full-matrix least-squares on F <sup>2</sup> |                  |
| Data / restraints / parameters    | 9772 / 0 / 613                              |                  |
| Goodness-of-fit on F <sup>2</sup> | 1.020                                       |                  |
| Final R indices [I>2sigma(I)]     | R1 = 0.0423, wR2 = 0.1060                   |                  |
| R indices (all data)              | R1 = 0.0563, wR2 = 0.1157                   |                  |
| Extinction coefficient            | n/a                                         |                  |
| Largest diff. peak and hole       | 0.318 and -0.354 e.Å <sup>-3</sup>          |                  |

**Table S2.** Bond lengths [Å] and angles [°] for **2a•1THF•1MeOH** (CCDC#2328542).

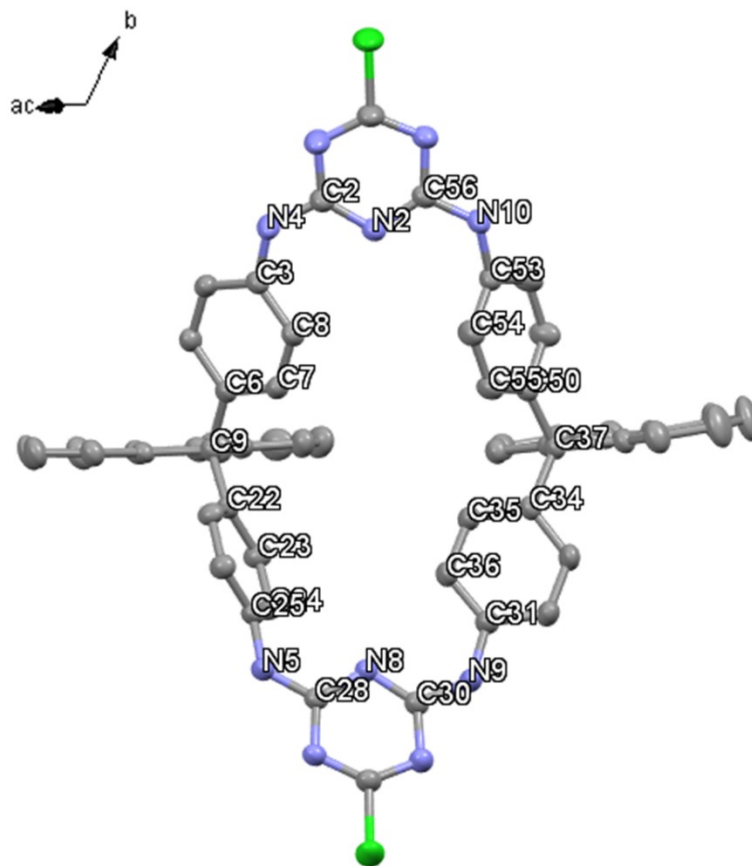

|     |     |          |     |     |     |          |
|-----|-----|----------|-----|-----|-----|----------|
| C56 | N2  | 1.339(3) | N2  | C2  | N4  | 120.5(2) |
| N2  | C2  | 1.330(2) | C2  | N4  | C3  | 128.3(2) |
| C2  | N4  | 1.349(3) | N4  | C3  | C8  | 124.1(2) |
| N4  | C3  | 1.413(3) | C3  | C8  | C7  | 120.0(2) |
| C3  | C8  | 1.386(2) | C8  | C7  | C6  | 121.8(2) |
| C8  | C7  | 1.388(3) | C7  | C6  | C9  | 121.7(2) |
| C7  | C6  | 1.390(3) | C6  | C9  | C22 | 112.0(2) |
| C6  | C9  | 1.541(3) | C9  | C22 | C23 | 121.8(2) |
| C9  | C22 | 1.543(2) | C22 | C23 | C24 | 121.5(2) |
| C22 | C23 | 1.385(2) | C23 | C24 | C25 | 119.8(2) |
| C23 | C24 | 1.390(3) | C24 | C25 | N5  | 120.5(2) |
| C24 | C25 | 1.381(3) | C25 | N5  | C28 | 124.7(2) |
| C25 | N5  | 1.435(2) | N5  | C28 | N8  | 119.1(2) |
| N5  | C28 | 1.341(2) | C28 | N8  | C30 | 114.4(2) |
| C28 | N8  | 1.341(3) | N8  | C30 | N9  | 120.6(2) |
| N8  | C30 | 1.327(2) | C30 | N9  | C31 | 131.6(2) |
| C30 | N9  | 1.354(3) | N9  | C31 | C36 | 124.6(2) |
| N9  | C31 | 1.415(3) | C31 | C36 | C35 | 119.2(2) |

|     |     |          |     |     |     |          |
|-----|-----|----------|-----|-----|-----|----------|
| C31 | C36 | 1.394(2) | C36 | C35 | C34 | 122.5(2) |
| C36 | C35 | 1.388(3) | C35 | C34 | C37 | 122.6(2) |
| C35 | C34 | 1.392(3) | C34 | C37 | C50 | 116.3(2) |
| C34 | C37 | 1.535(3) | C37 | C50 | C55 | 125.5(2) |
| C37 | C50 | 1.544(2) | C50 | C55 | C54 | 121.3(2) |
| C50 | C55 | 1.384(3) | C55 | C54 | C53 | 120.2(2) |
| C55 | C54 | 1.397(2) | C54 | C53 | N10 | 122.9(2) |
| C54 | C53 | 1.376(3) | C53 | N10 | C56 | 126.7(2) |
| C53 | N10 | 1.422(2) | N10 | C56 | N2  | 119.6(2) |
| N10 | C56 | 1.334(2) | C56 | N2  | C2  | 114.6(2) |

**Table S3.** The intermolecular H-bond (NH-N, NH-C, CH-Cl) and  $\pi$ - $\pi$  (CH- $\pi$ ,  $\pi$ - $\pi$ )

interactions of macrocycle **2a** (THF and MeOH omitted) in the framework.

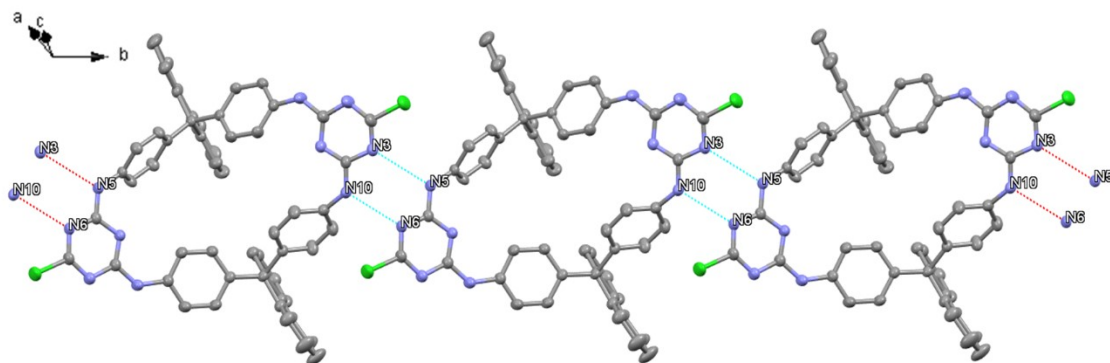

| D-H...A            | D-H<br>length(Å) | H...A<br>length(Å) | D...A<br>length(Å) | D-H...A<br>angle(°) |
|--------------------|------------------|--------------------|--------------------|---------------------|
| N(5)-H(5A)···N(3)  | 0.8802(20)       | 2.2409(21)         | 3.0881(29)         | 161.464(128)        |
| N(10)-H(10)···N(6) | 0.8793(20)       | 2.0700(19)         | 2.9200(28)         | 162.325(123)        |

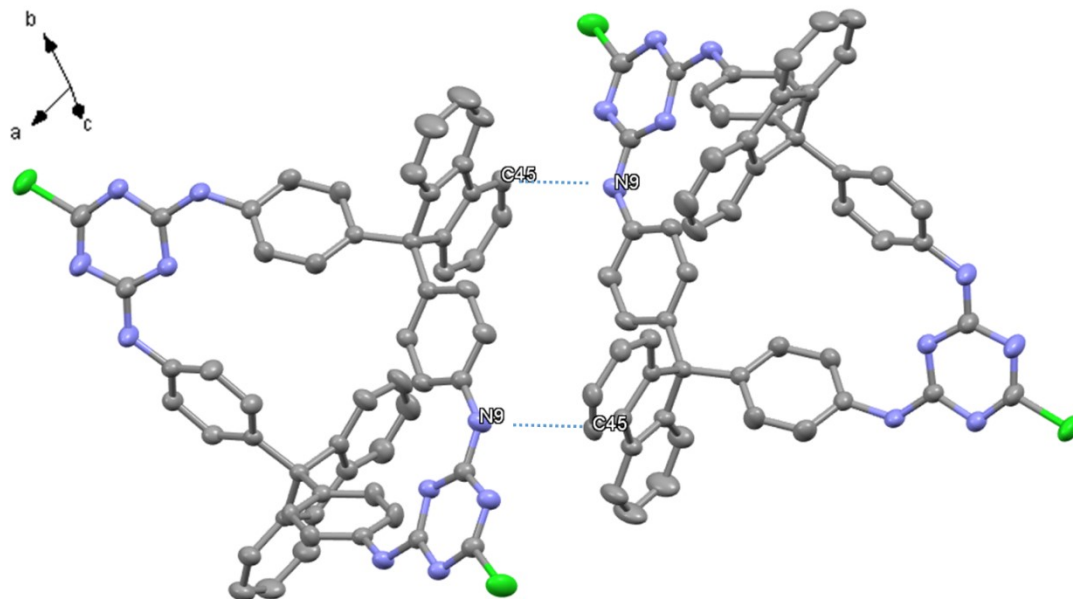

| D-H...A            | D-H<br>length(Å) | H...A<br>length(Å) | D...A<br>length(Å) | D-H...A<br>angle(°) |
|--------------------|------------------|--------------------|--------------------|---------------------|
| N(9)-H(9)···C(45)  | 0.8799(12)       | 2.8774(15)         | 3.7169(19)         | 160.108(114)        |
| C(45)-H(45)···N(9) | 0.9499(23)       | 3.4887(14)         | 3.7169(19)         | 96.423(125)         |



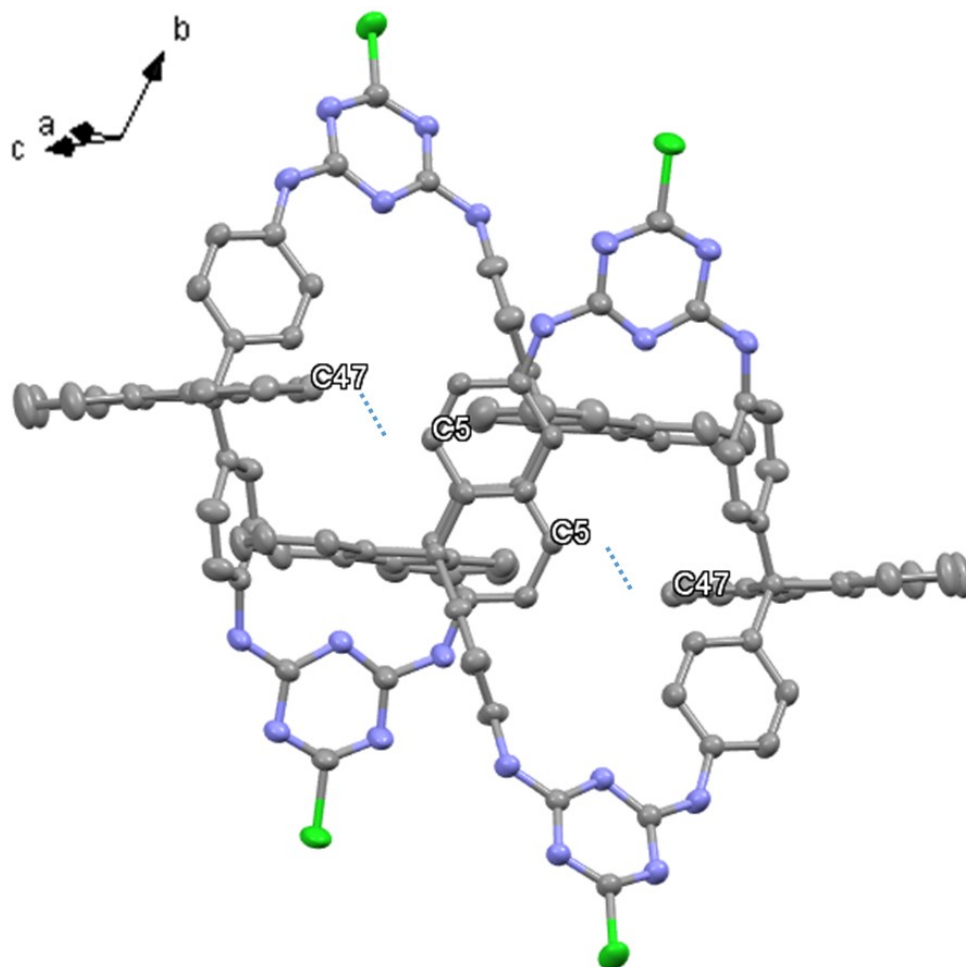

| D-H...A          | D-H<br>length(Å) | H...A<br>length(Å) | D...A<br>length(Å) | D-H...A<br>angle(°) |
|------------------|------------------|--------------------|--------------------|---------------------|
| C(5)-H(5)⋯C(47)  | 0.9492(19)       | 2.9627(20)         | 3.7529(26)         | 141.561(108)        |
| C(47)-H(47)⋯C(5) | 0.9509(21)       | 2.9847(18)         | 3.7529(26)         | 138.813(115)        |

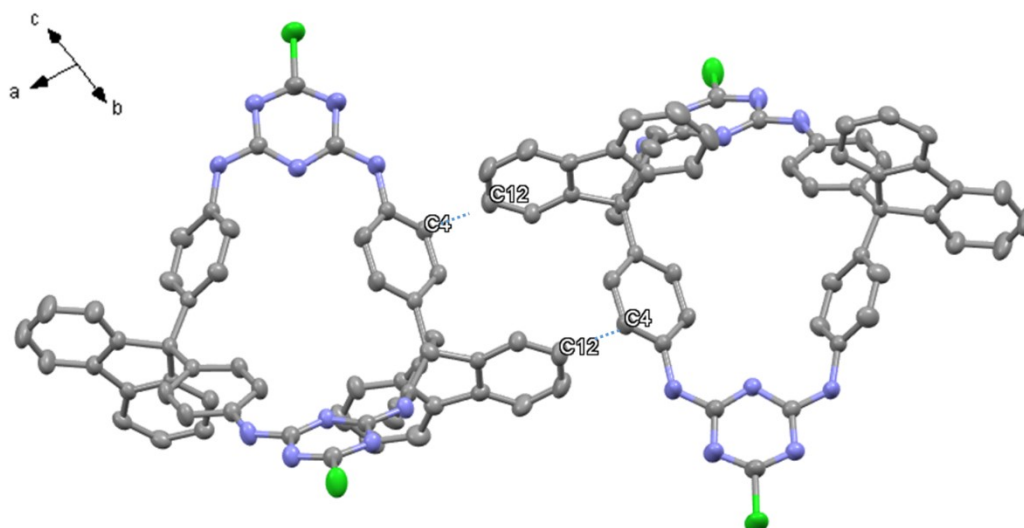

| D-H...A            | D-H<br>length(Å) | H...A<br>length(Å) | D...A<br>length(Å) | D-H...A<br>angle(°) |
|--------------------|------------------|--------------------|--------------------|---------------------|
| C(12)-H(12)···C(4) | 0.9503(25)       | 2.7902(24)         | 3.5392(37)         | 136.362(167)        |
| C(4)-H(4)···C(12)  | 0.9504(14)       | 3.7964(28)         | 3.5392(37)         | 67.256(126)         |

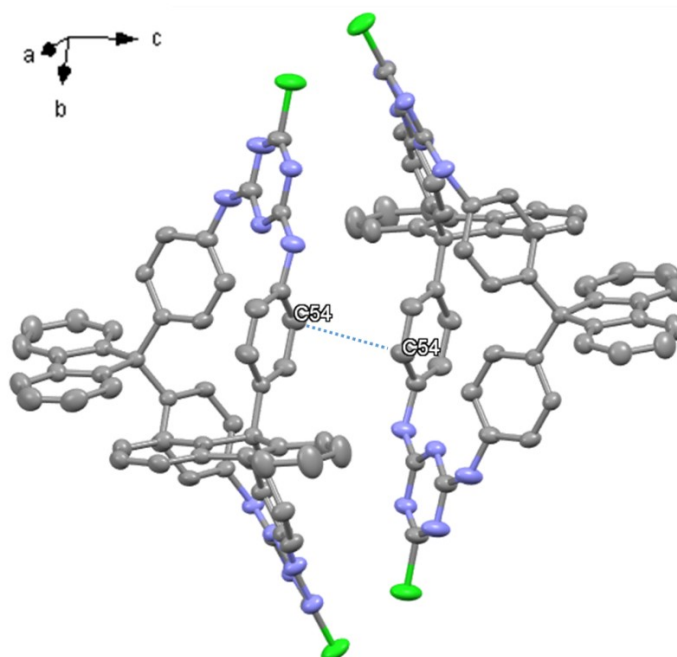

| D-H...A             | D-H<br>length(Å) | H...A<br>length(Å) | D...A<br>length(Å) | D-H...A<br>angle(°) |
|---------------------|------------------|--------------------|--------------------|---------------------|
| C(54)-H(54)···C(54) | 0.9505(24)       | 3.0865(19)         | 3.3202(30)         | 95.806(128)         |

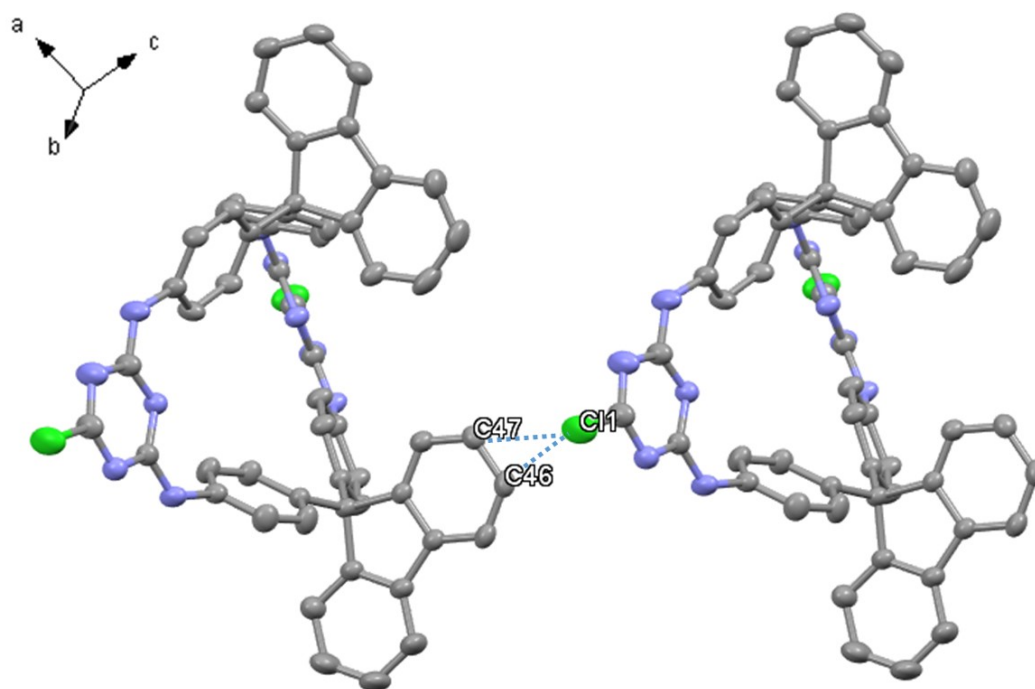

| D-H...A             | D-H<br>length(Å) | H...A<br>length(Å) | D...A<br>length(Å) | D-H...A<br>angle(°) |
|---------------------|------------------|--------------------|--------------------|---------------------|
| C(46)-H(46)···Cl(1) | 0.9507(24)       | 3.1891(7)          | 3.2693(23)         | 86.356(130)         |
| C(47)-H(47)···Cl(1) | 0.9509(21)       | 3.2946(5)          | 3.3403(19)         | 84.494(127)         |

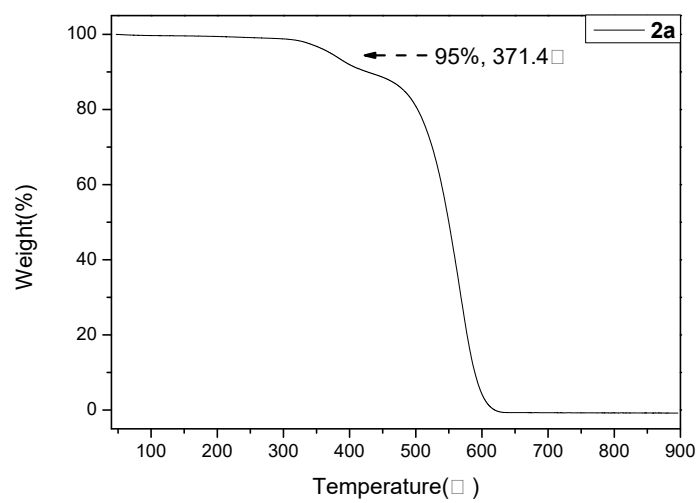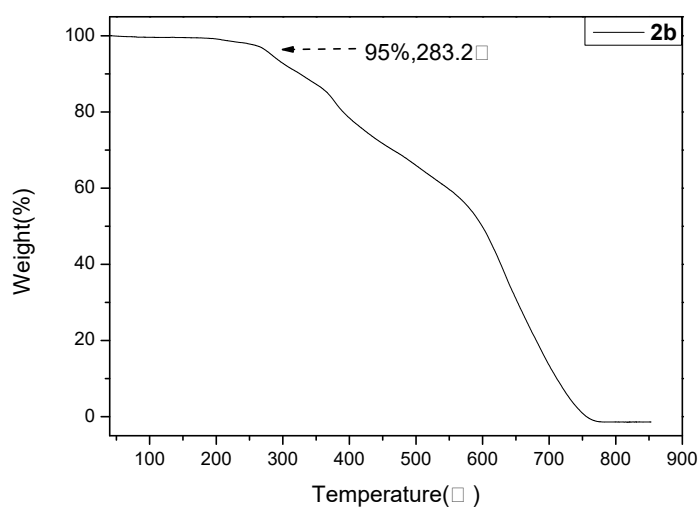

**Figure S1.** Thermogravimetric analysis of dried **2a** and **2b** from 50 to 850 °C at a heating rate of 10 °C min<sup>-1</sup> under an N<sub>2</sub> atmosphere.

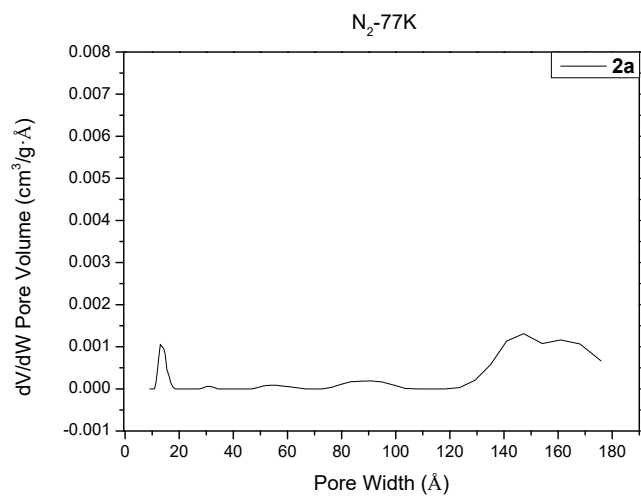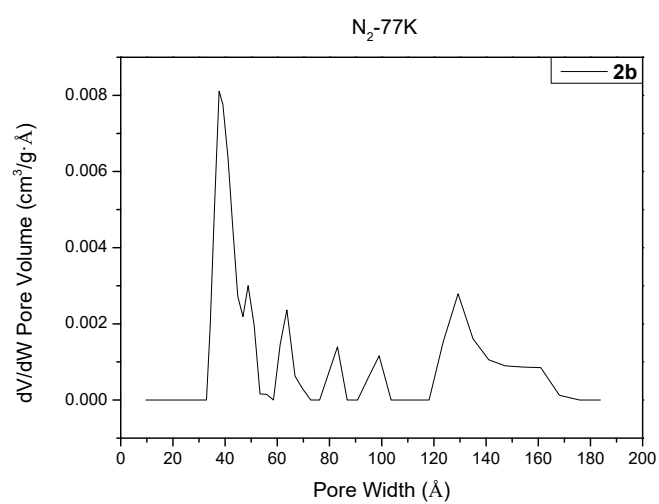

**Figure S2.** The pore size distributions of **2a** and **2b**, calculated by NLDFT based on their N<sub>2</sub> isotherms at 77 K.

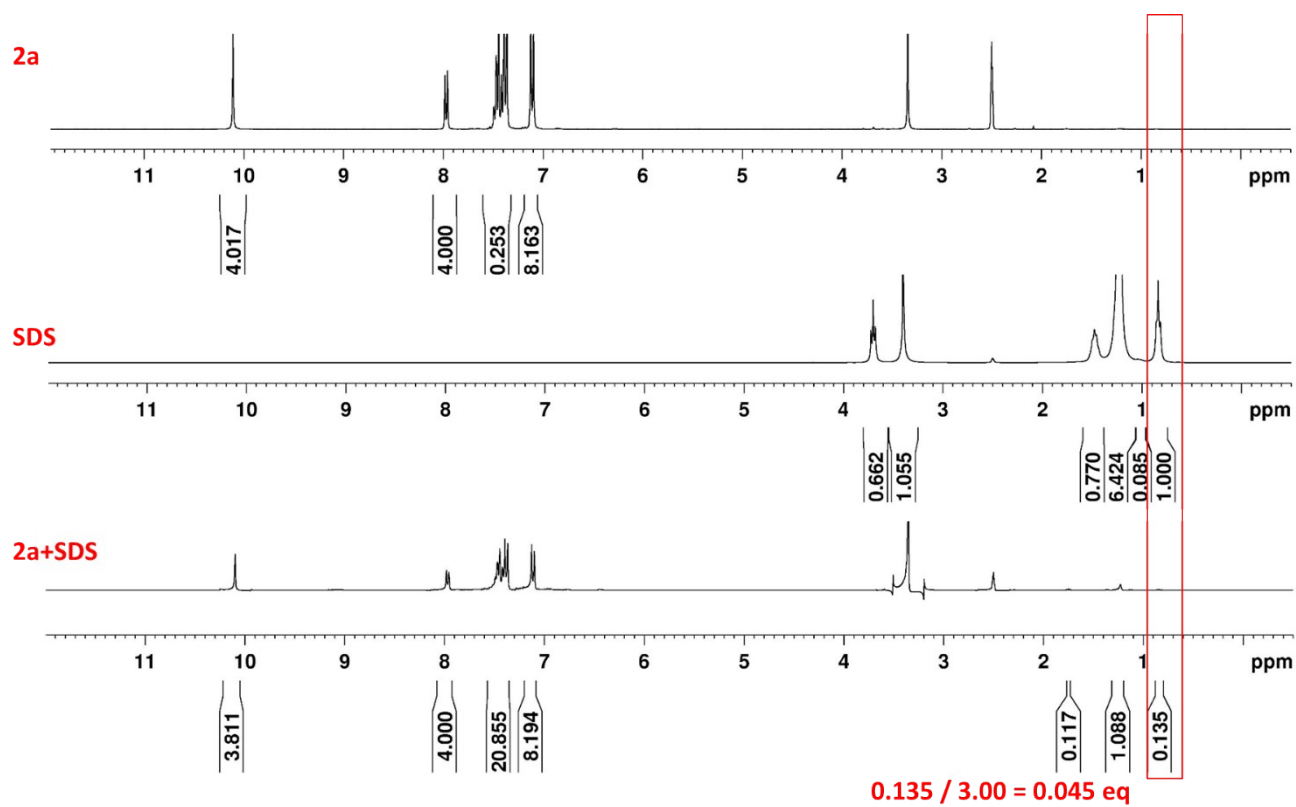

**Figure S3.** The  $^1\text{H}$ -NMR spectra of **2a**, SDS and **2a**-SDS in showing the adsorption of SDS by **2a**.

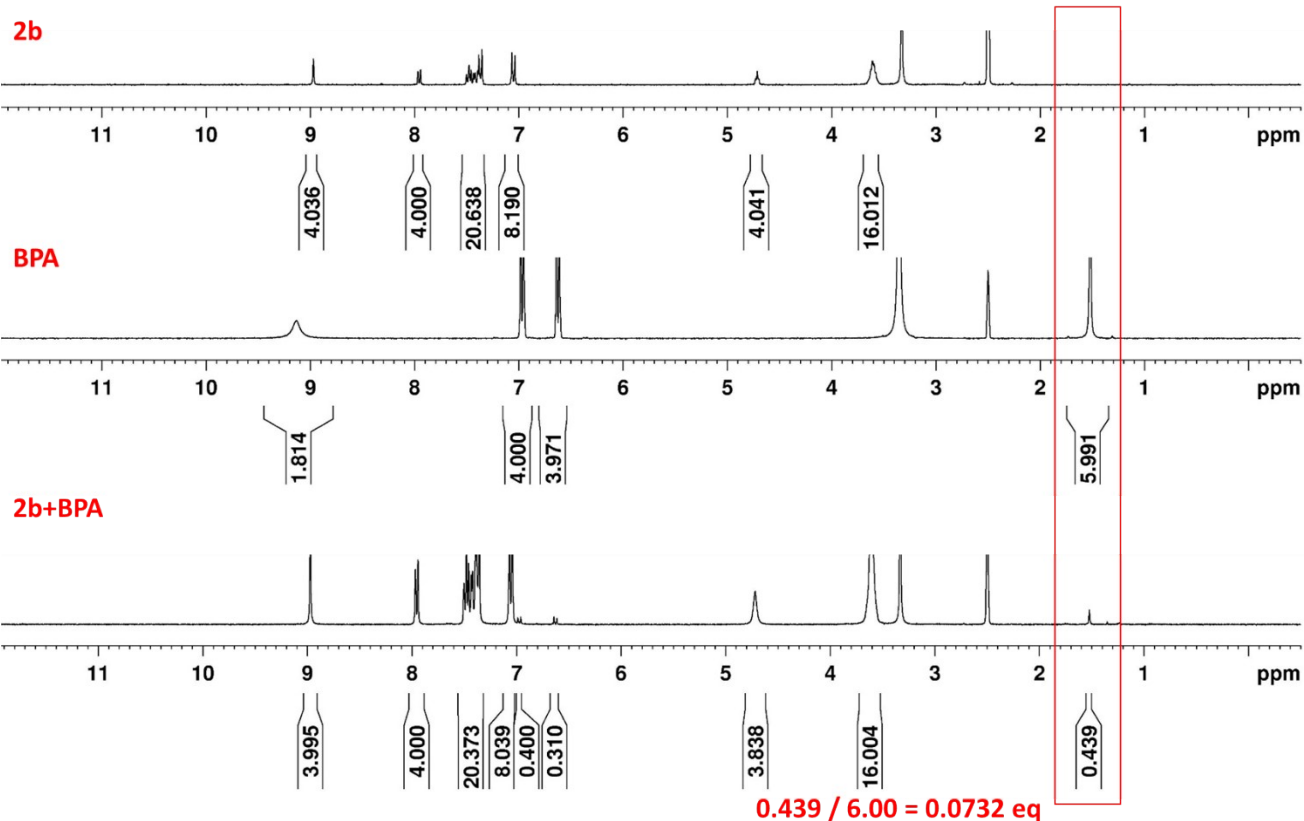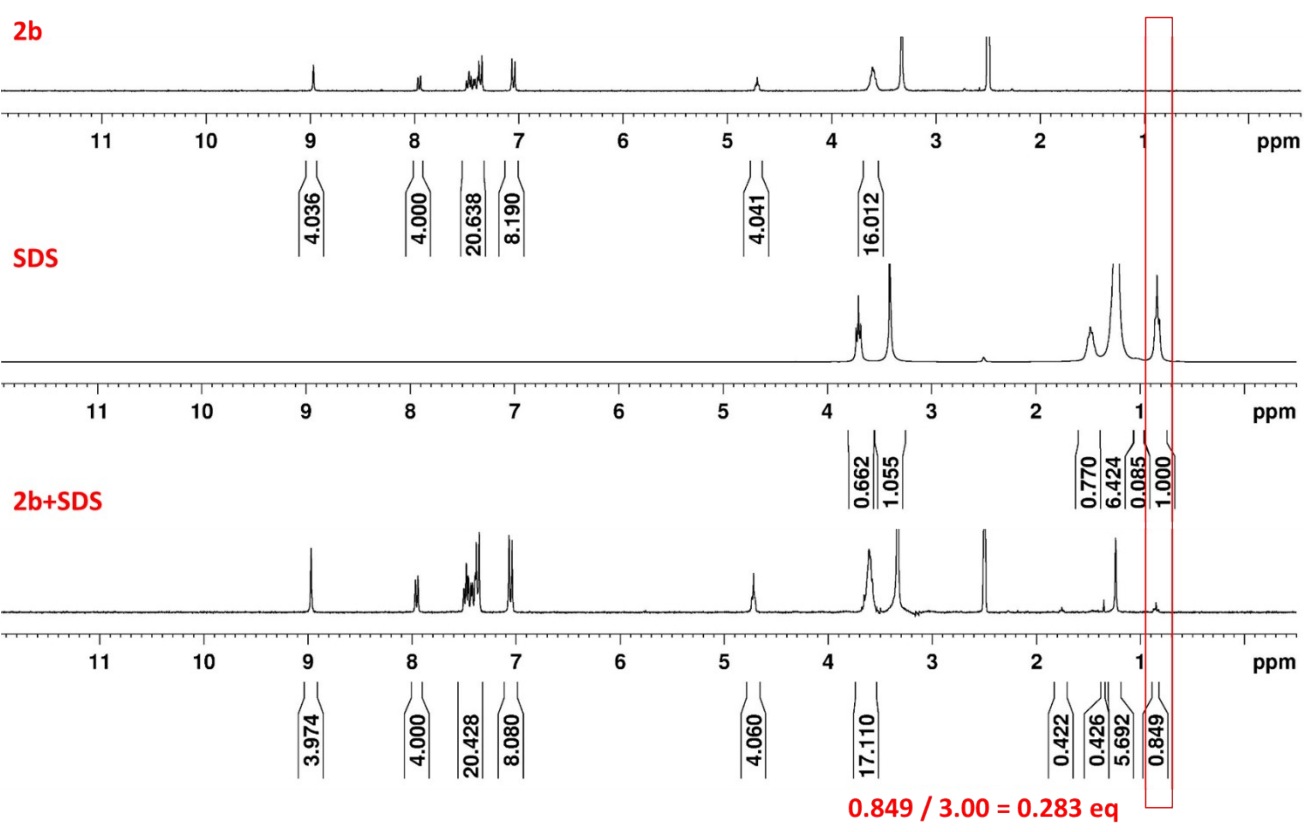

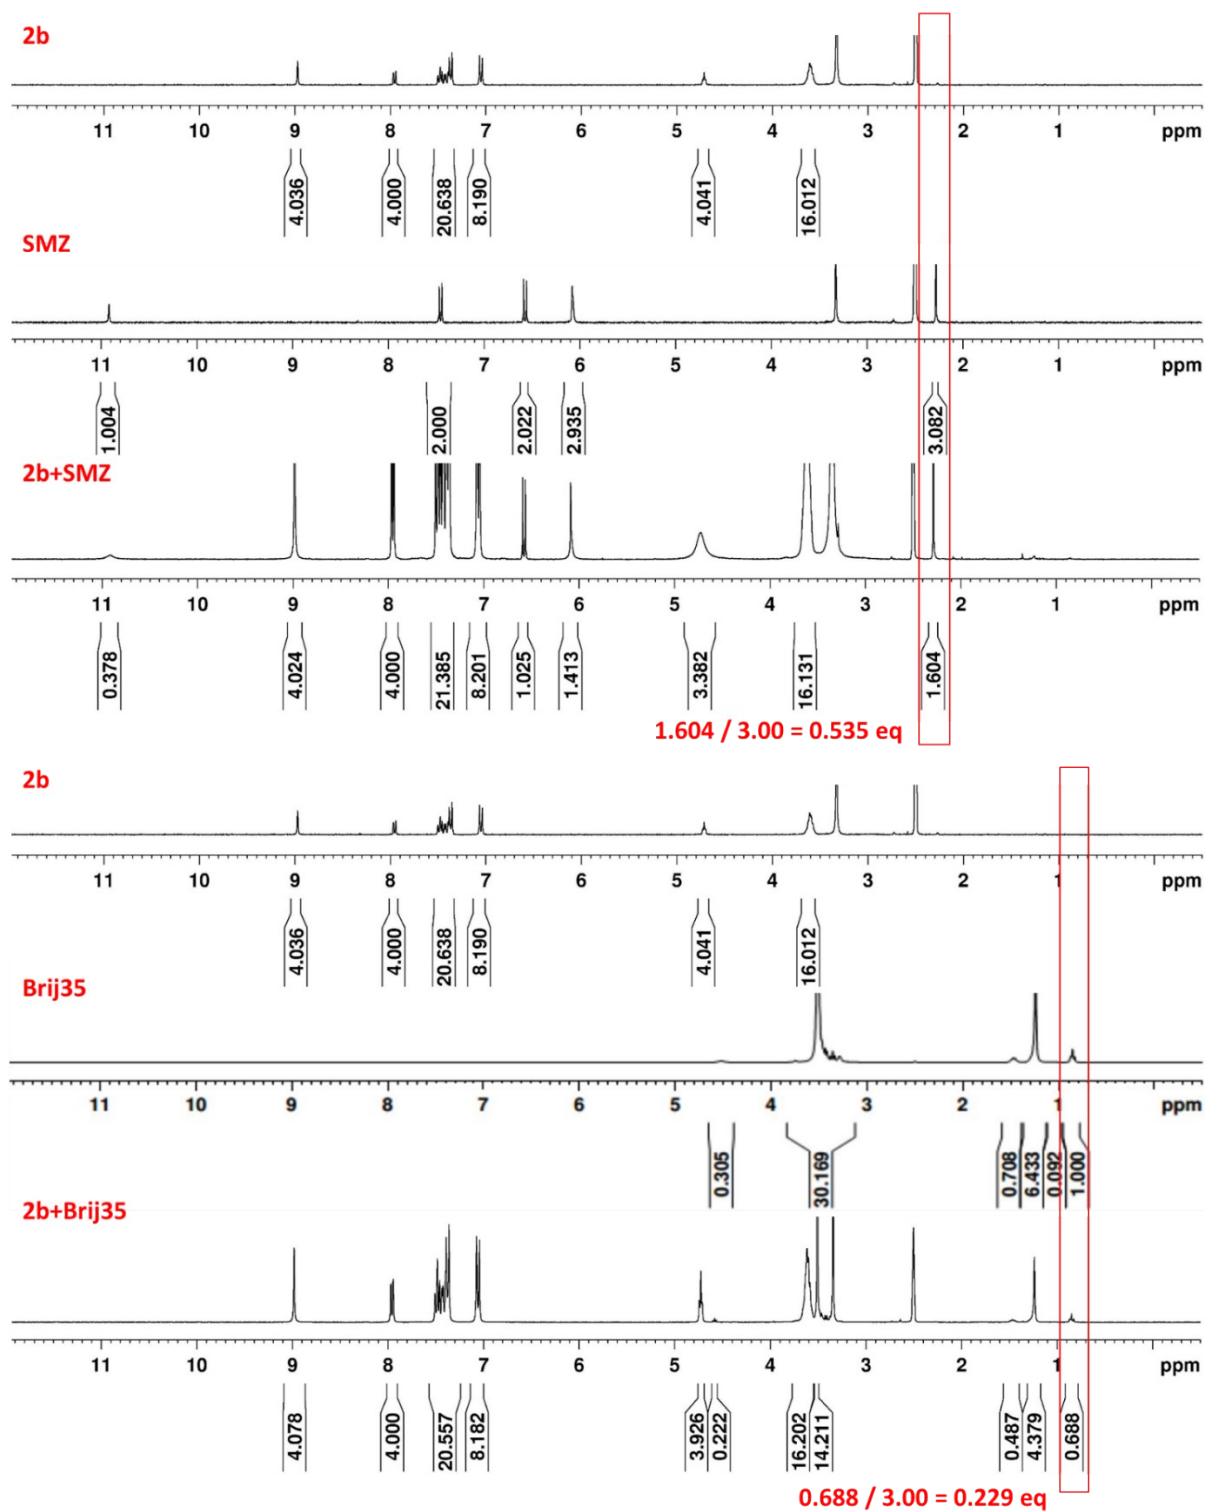

**Figure S4.** The <sup>1</sup>H-NMR spectra of **2b** with BPA, SDS, SMZ and Brij35, respectively, in showing their adsorption by **2b**.



**2b**

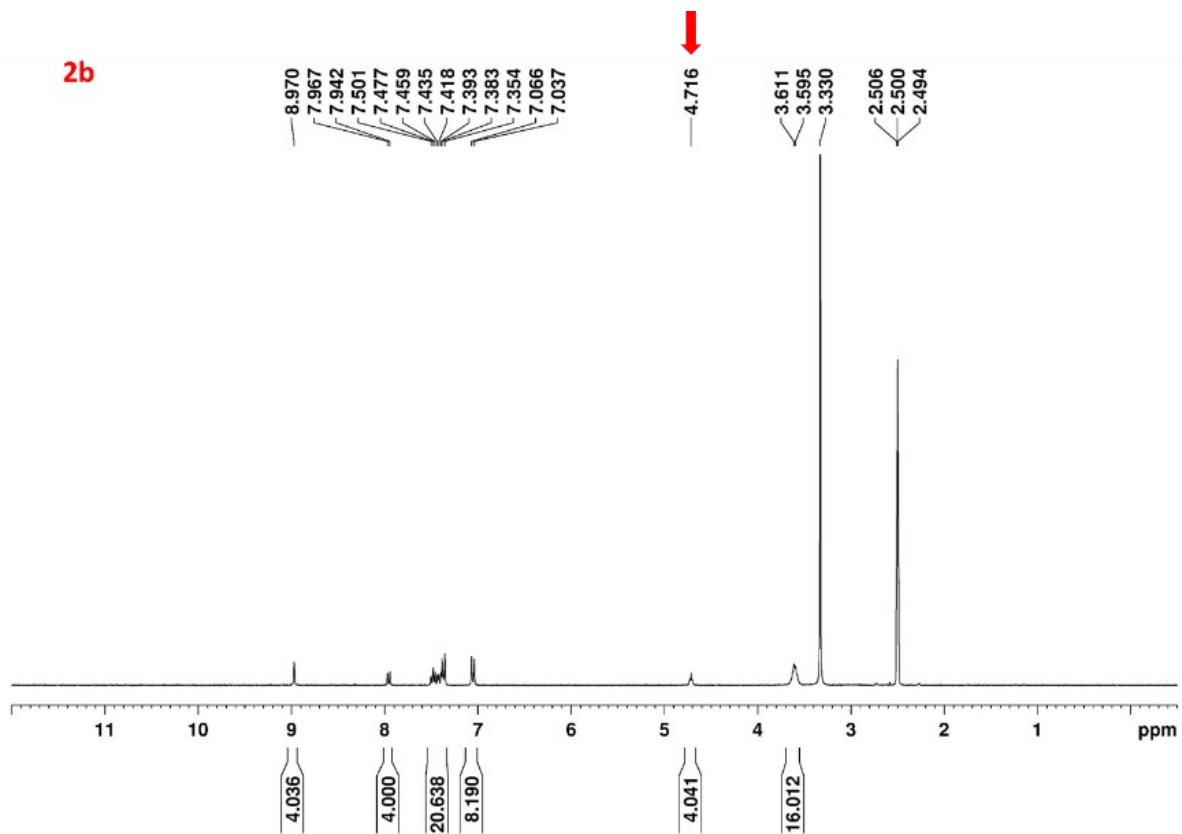

**2b+BPA**

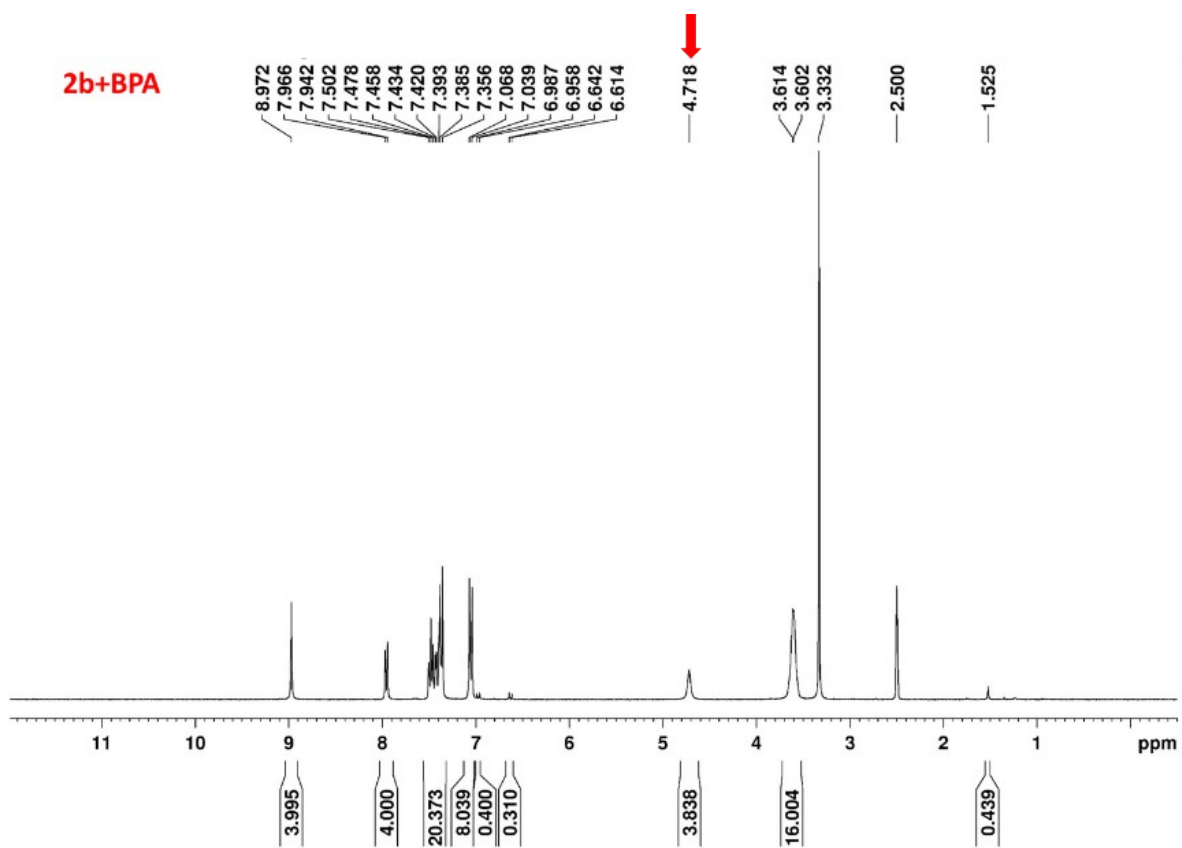

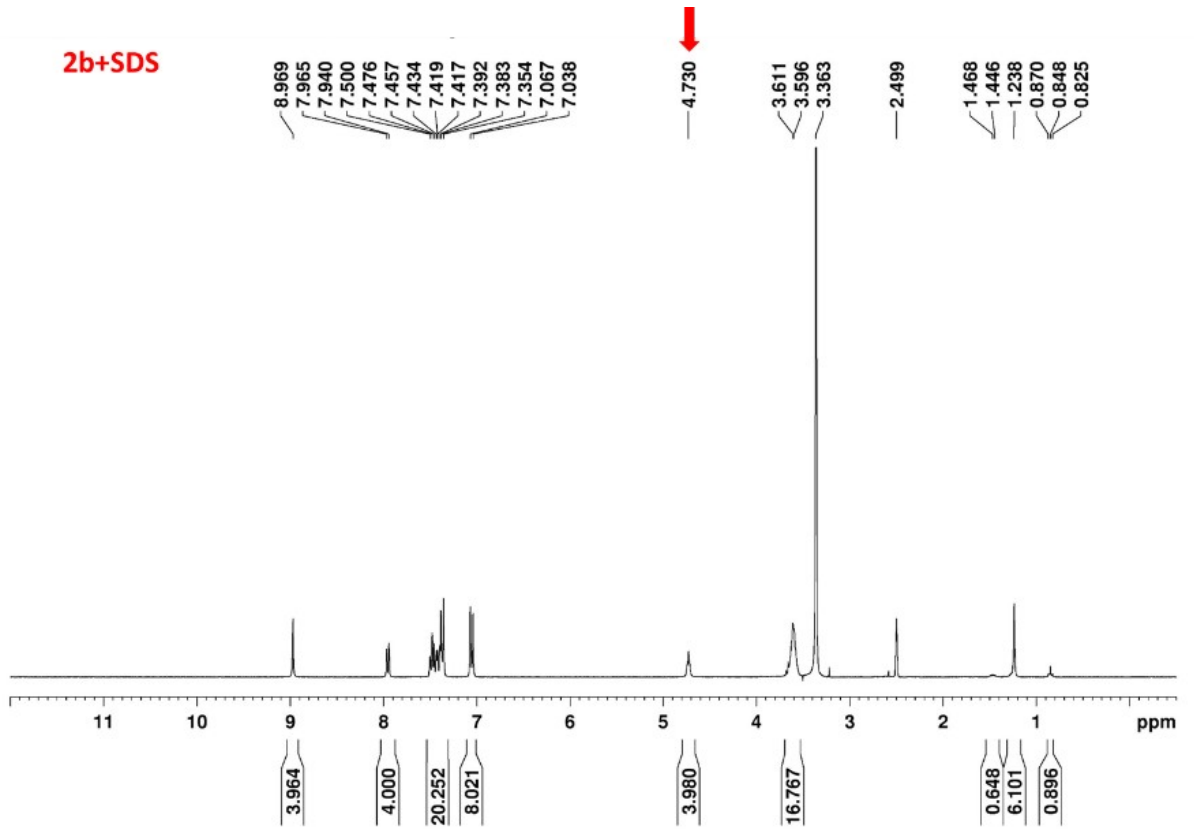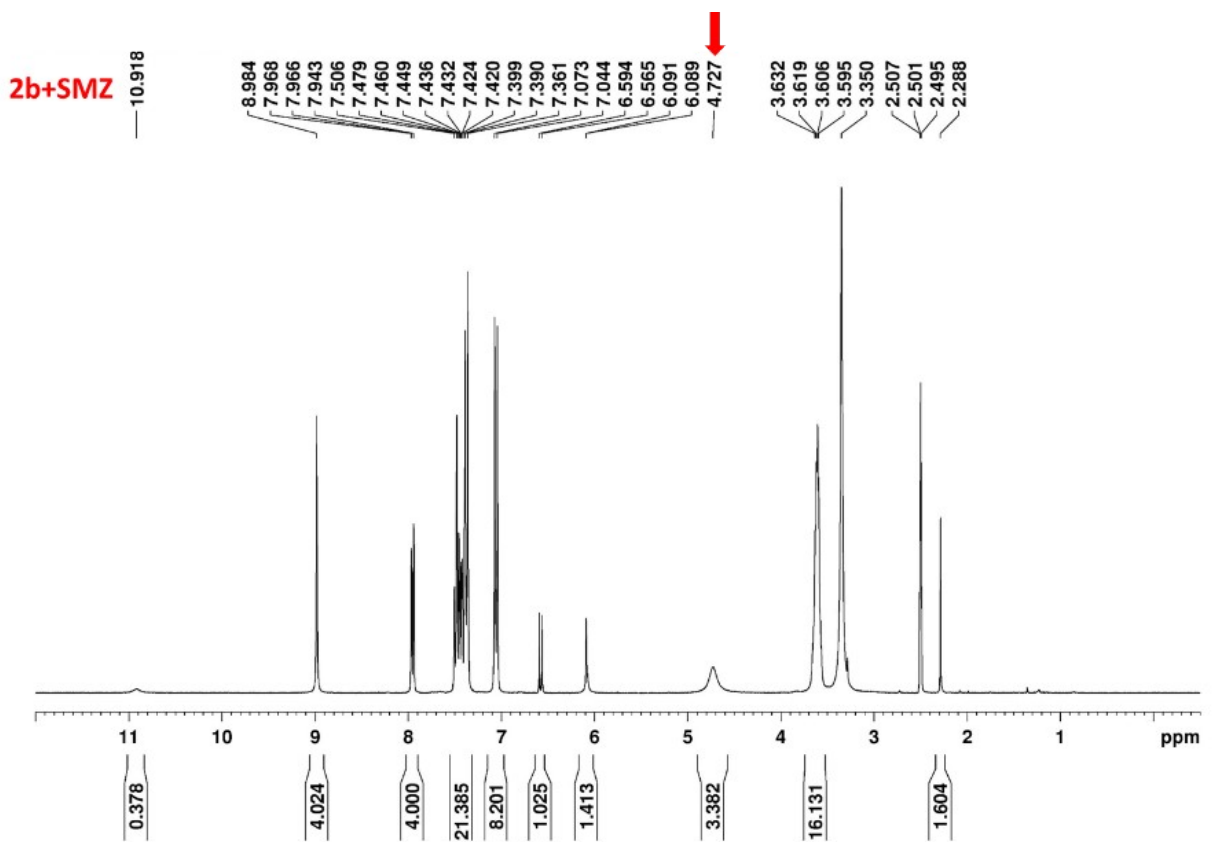

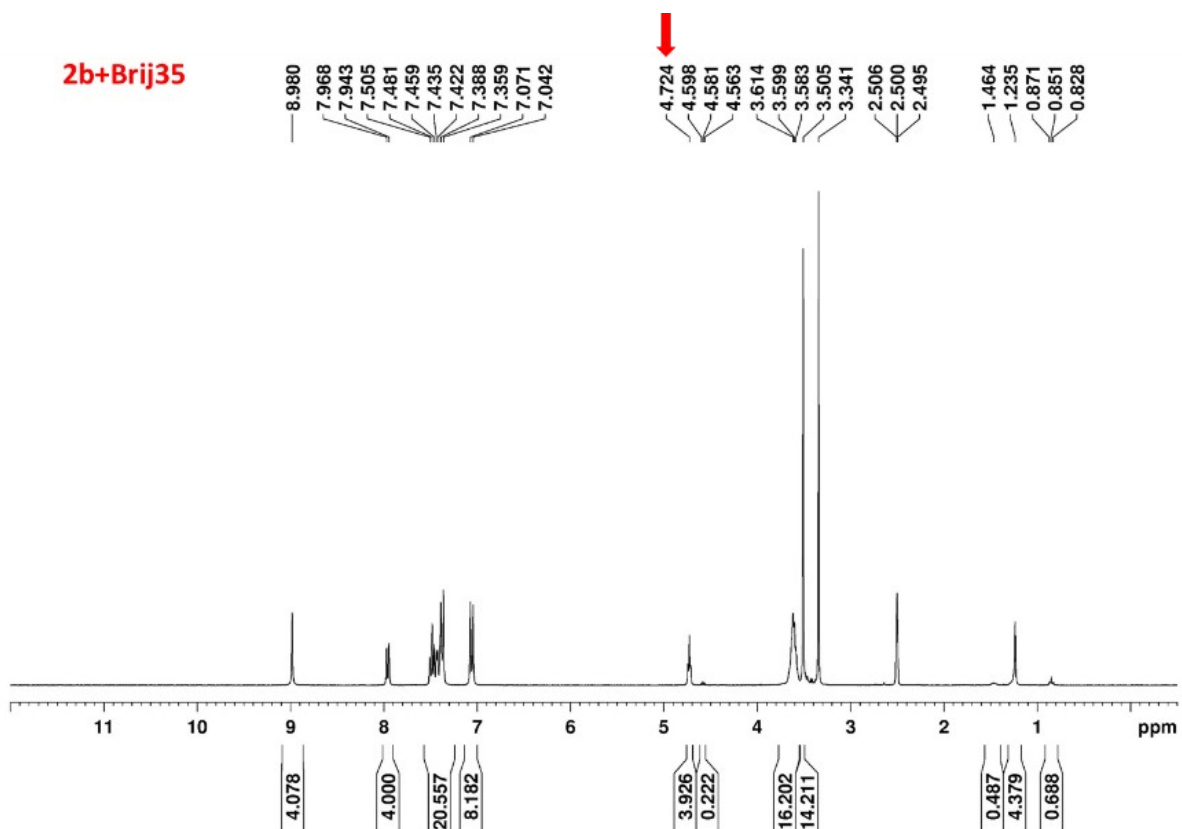

**Figure S5.** The <sup>1</sup>H-chemical shifts of **2b** and **2b** with BPA, SDS, SMZ and Brij35, respectively.

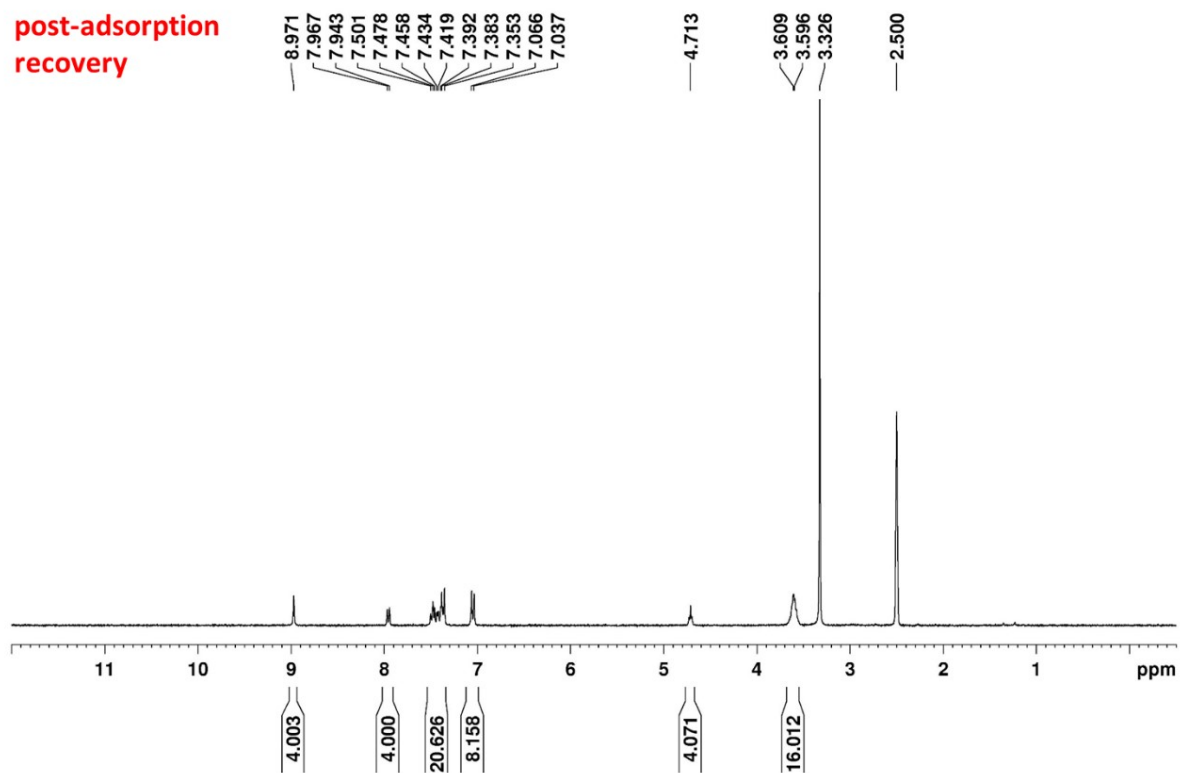

**Figure S6.** The  $^1\text{H}$ -chemical shifts of **2b** after recovery.

1. G. Sheldrick, *Acta Crystallogr. Sect. A*, 2008, **64**, 112-122.
